# Supplementary material
Source: Springer Nature journal article supplement (https://www.springermedizin.de/resource/supplementary/12879_2011_1739_MOESM3_ESM.pdf/9443924)

**Seroprevalence rate**

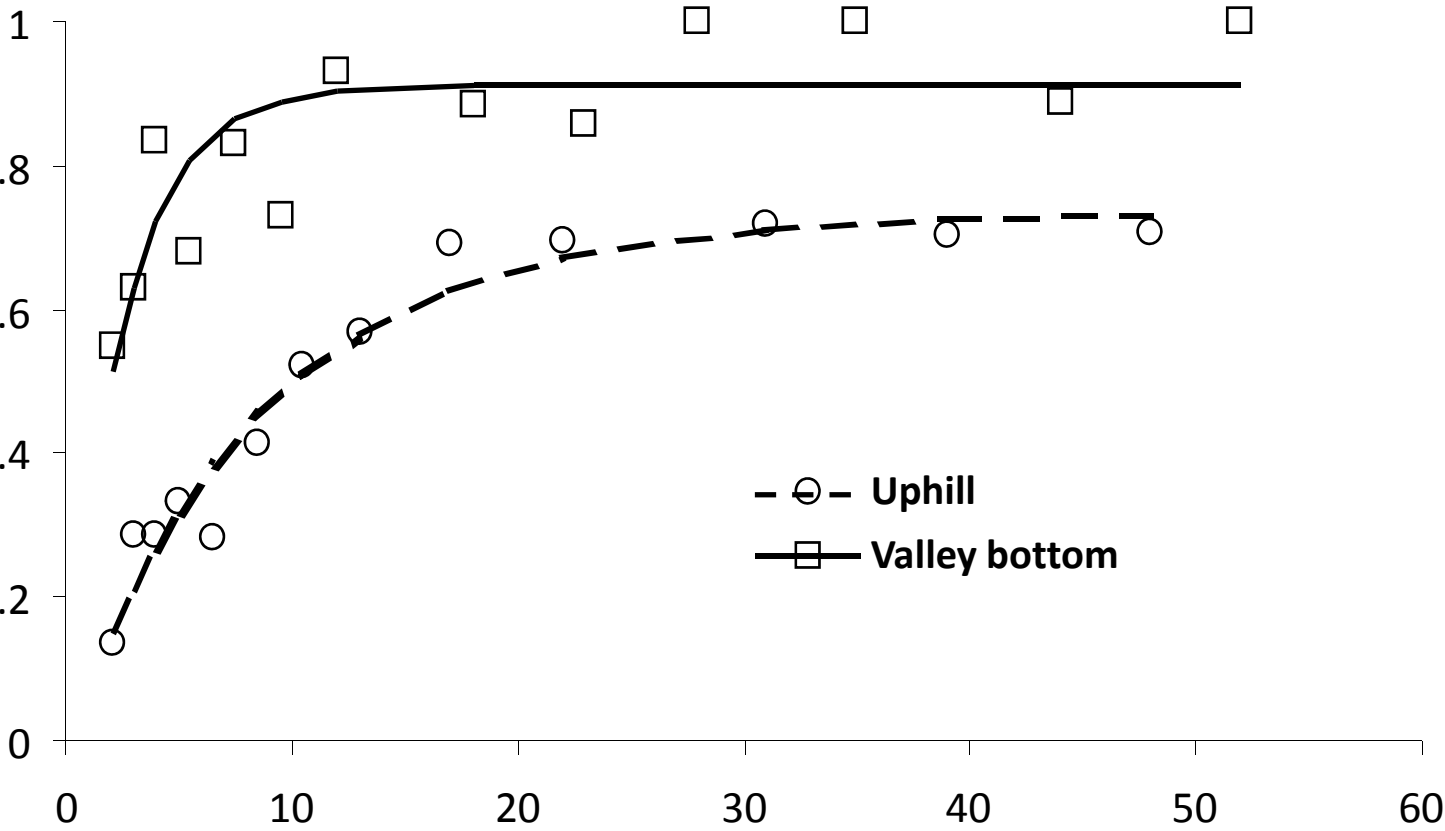

- ○ - Uphill  
- □ - Valley bottom

**Age (years)**

Supplement: MOESM3 [file 9443924]
